# Supplementary material
Source: PubMed Central journal article supplement (PMC4158828)
Supplement: NIHMS622503-supplement-Supplementary_Data.pdf [file NIHMS622503-supplement-Supplementary_Data.pdf]

**Supplementary Information:**

**Microbial Glycan Microarrays Define Key Features of Host-Microbial Interactions**

Sean R. Stowell<sup>1,5</sup>, Connie M. Arthur<sup>1,5</sup>, Ryan McBride<sup>2,5</sup>, Oren Berger<sup>2</sup>, Nahid Razi<sup>2</sup>, Jamie Heimburg-Molinaro<sup>1</sup>, Lilian C. Rodrigues<sup>1</sup>, Jean-Philippe Gourdine<sup>1</sup>, Alexander J. Noll<sup>1</sup>, Stephan von Gunten<sup>4</sup>, David F. Smith<sup>1</sup>, Yuriy A. Knirel<sup>3</sup>, James C. Paulson<sup>2,\*</sup>, Richard D. Cummings<sup>1,\*</sup>

<sup>1</sup>Department of Biochemistry and the Glycomics Center, Emory University School of Medicine, Atlanta, GA 30322

<sup>2</sup>Departments of Cell and Molecular Biology, and Chemical Physiology The Scripps Research Institute, 10550 North Torrey Pines Road, La Jolla, CA 92037

<sup>3</sup>N. D. Zelinsky Institute of Organic Chemistry, Russian Academy of Sciences, 119991 Moscow, Russia

<sup>4</sup>Institute of Pharmacology, University of Bern, Bern, Switzerland

<sup>5</sup>Equal Contribution

\*To Whom Correspondence Should be Addressed:

Richard D. Cummings, Ph.D.  
Department of Biochemistry  
Emory University School of Medicine  
1510 Clifton Rd – Room #4001  
Atlanta, GA 30322  
Tel: (404)727-5962  
Fax: (404)727-2738  
Email: [rdcummi@emory.edu](mailto:rdcummi@emory.edu)

James C. Paulson, Ph.D.  
Department of Chemical Physiology  
Joint Department of Molecular Biology  
10550 North Torrey Pines Road, MEM-L71

## Supplementary Results:

### Supplementary Figure 1

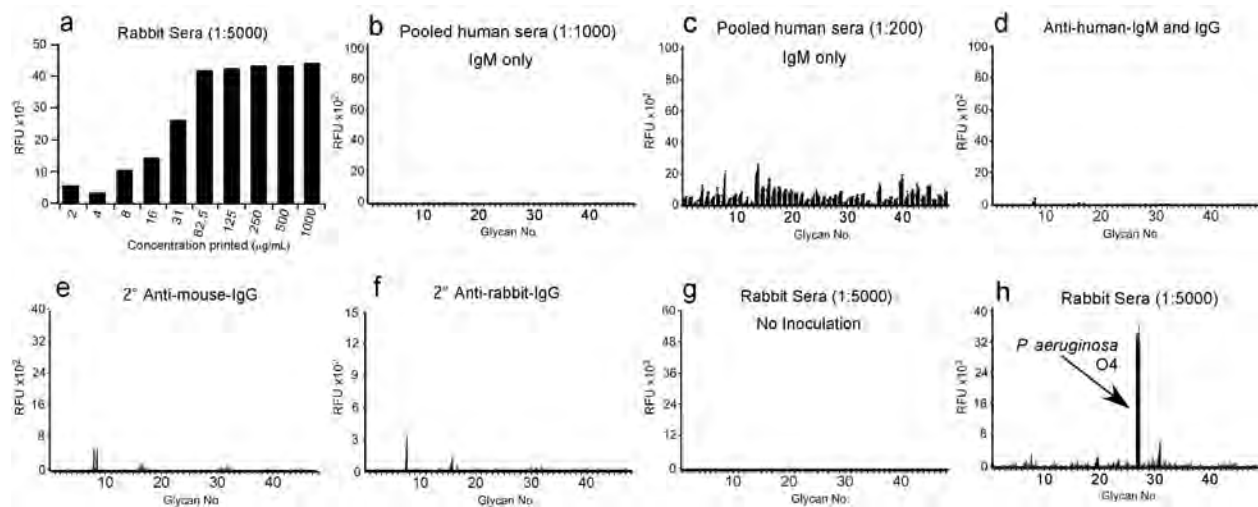

**Supplementary Figure 1. Recognition of microbial glycan structures by sera.** (a) Anti-*Pseudomonas aeruginosa* O2 serum interrogation of printed *P. aeruginosa* O2a O-antigen. Graph represents hybridization of standard protocol printing on Codelink glass slide (GE Healthcare) with antigens printed at 2  $\mu\text{g/mL}$  to 1 mg/mL. (b-h) MGMv1 data obtained after incubation with pooled normal human sera at 1:1000 followed by anti-IgM alone (b), pooled normal human sera at 1:200 followed by labeled anti-IgM (c), anti-human IgG and anti-human IgM alone (d), anti-mouse IgG alone (e), anti-rabbit IgG alone (f), 1:5000 dilution of normal rabbit sera (g), or sera from rabbits challenged with the indicated bacterial species followed by detection with anti-rabbit IgG (h). See **Supplementary Dataset 1** for complete microarray data.

## Supplementary Figure 2

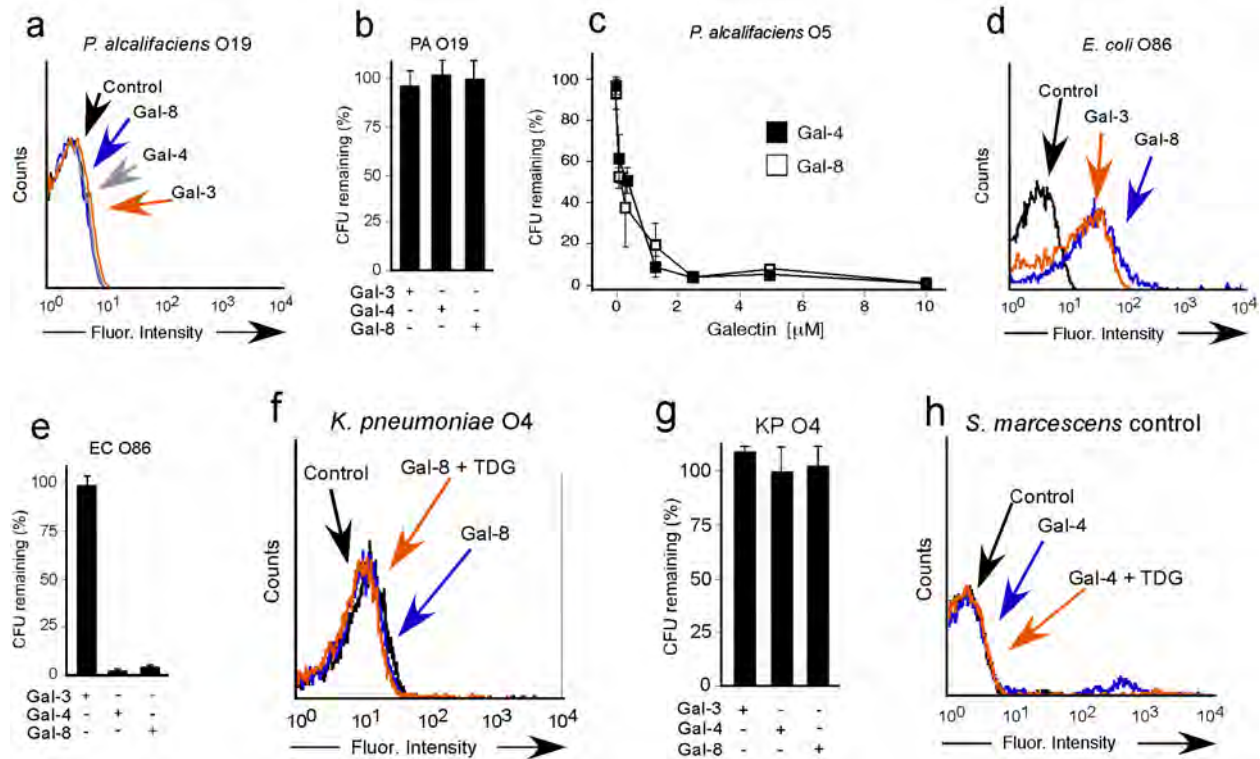

**Supplementary Figure 2. Bacterial targets for galectin binding and killing require self like antigen.** (a) Flow cytometric analysis of *P. alcalifaciens* O19 (PA O19) after incubation with Gal-3, Gal-4, or Gal-8 at ~0.1 μM. (b) Quantification of PA O19 after addition of 5 μM Gal-3, Gal-4, or Gal-8. (c) Quantification of PA O5 after addition of the indicated concentrations of Gal-4 and Gal-8. (d) Flow cytometric analysis of *E. coli* O86 (EC O86) after incubation with Gal-3 and Gal-8 at ~0.1 μM. (e) Quantification of EC O86 after addition of 5 μM Gal-3, Gal-4, or Gal-8. (f) Flow cytometric analysis of *K. pneumoniae* O4 (KP O4) after incubation with ~0.1 μM Gal-8 with or without inclusion of 20 mM TDG. (g) Quantification of KP O4 after addition of 5 μM Gal-3, Gal-4, or Gal-8 (n=2 in 1 representative experiment of 2-3). (h) Flow cytometric analysis of SM control strain after incubation with ~0.1 μM Gal-4 with or without inclusion of 20 mM TDG. Viable bacteria were quantified by dilution plating, n = 2-3 in 1 representative experiment of 3; error bars represent means ± 1 s.d.

### Supplementary Figure 3

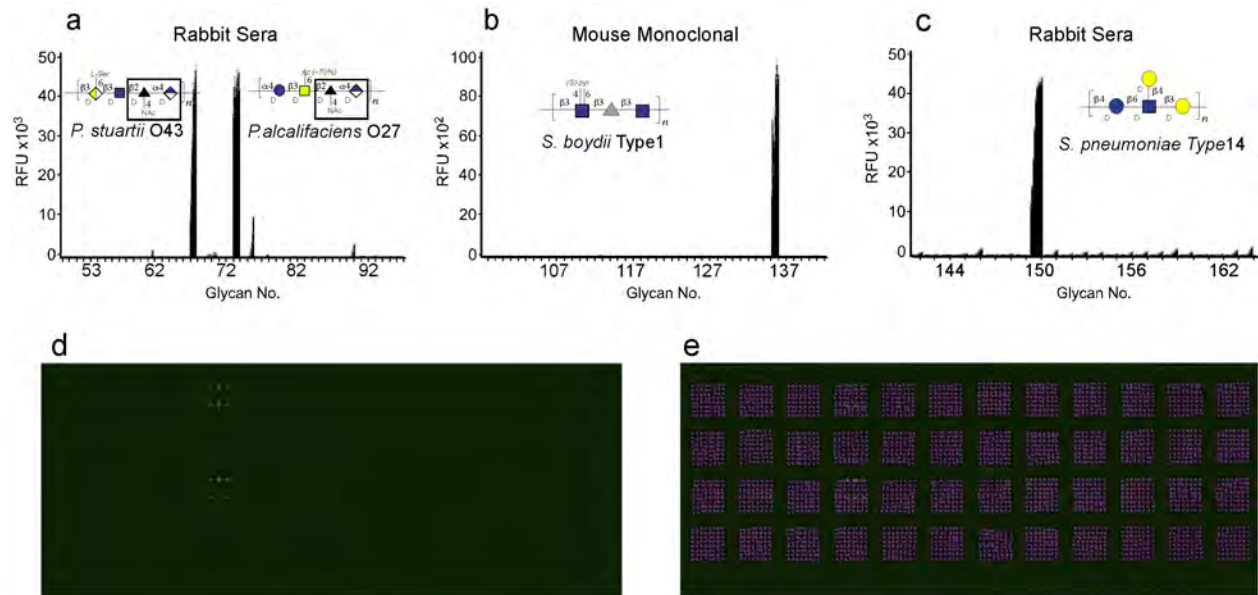

### Supplementary Figure 3. Antibody detection of specific immobilized microbial antigens.

MGM data obtained after incubation with sera from rabbits or mice challenged with *Providencia alcalifaciens* O27 (a), *Shigella boydii* Type1 (b) or *Streptococcus pneumoniae* Type14 (c). Antigens printed at 0.5mg/mL and hybridized with anti-sera diluted 1:5000 or 10  $\mu$ g/mL of monoclonal antibody. Symbol nomenclature illustrates the facile identification of the common - $\beta$ 2-QuiNAc- $\alpha$ 4-GlcA- epitope of *P. stuartii* O43 (#67) and *P. alcalifaciens* O27 (#73). (d-e) Representative slide images obtained following incubation with sera from rabbits challenged with *Providencia alcalifaciens* O19 without the overlay grid (d) or with the overlay grid (e) used to assign the fluorescent signal obtained to each printed glycan. See **Supplementary Dataset 3** for complete microarray data.

Supplementary Figure 4

| Mammalian structure                   | Microbial structure                                                              |
|---------------------------------------|----------------------------------------------------------------------------------|
| <p>Blood group B</p>                  | <p><i>E. coli</i> O86</p>                                                        |
| <p>Blood group H</p>                  | <p><i>E. coli</i> O128</p>                                                       |
| <p>Sia <math>\alpha</math> LacNAc</p> | <p><i>S. agalactiae</i> A909</p>                                                 |
| <p><math>\alpha</math> Gal LacNAc</p> | <p><i>P. alcalifaciens</i> O5</p>                                                |
| <p><math>\alpha</math> Gal</p>        | <p><i>K. pneumoniae</i> O1    <i>S. marcescens</i> O20    <i>E. coli</i> O55</p> |
| <p><math>\beta</math> Gal</p>         | <p><i>H. influenzae</i> 2019    <i>S. pneumoniae</i> 70</p>                      |
| <p>Glycosaminoglycans (GAG)</p>       | <p><i>P. alcalifaciens</i> O6    <i>P. vulgaris</i> O45</p>                      |
| <p>N/A</p>                            | <p><i>P. alcalifaciens</i> O19    <i>K. pneumoniae</i> O4</p>                    |

**Supplementary Figure 4. Schematic representation of mammalian and microbial carbohydrate determinants.** Structures of commonly occurring mammalian glycans are shown as indicated with corresponding structures synthesized by the indicated microbial species. Symbol nomenclature is shown in **Supplementary Figures 5 and 6.**



Supplementary Figure 5

## Expanded Carbohydrate Symbol Nomenclature

**Hexoses: All NAc's and amines are in the two position.**

|           |  |        |  |      |  |      |  |
|-----------|--|--------|--|------|--|------|--|
| Glucose   |  | GlcNAc |  | GlcN |  | GlcA |  |
| Galactose |  | GalNAc |  | GalN |  | GalA |  |
| Mannose   |  | ManNAc |  | ManN |  | ManA |  |
| Idose     |  | IdoNAc |  | IdoN |  | IdoA |  |
| Gulose    |  | GulNAc |  | GulN |  | GulA |  |
| Altrose   |  | AltNAc |  | AltN |  | AltA |  |
| Talose    |  | TalNAc |  | TalN |  | TalA |  |
| Allose    |  | AlfNAc |  | AlfN |  | AlfA |  |

**6-Deoxy Sugars: All NAc's and amines are in the two position.**

|           |  |        |  |      |  |
|-----------|--|--------|--|------|--|
| Fucose    |  | FucNAc |  | FucN |  |
| Quinovose |  | QuiNAc |  | QuiN |  |
| Rhamnose  |  | RhaNAc |  | RhaN |  |

**3,6-Di-deoxy Sugars**

|          |  |          |  |
|----------|--|----------|--|
| Colitose |  | Tyvelose |  |
|----------|--|----------|--|

**Pentoses**

|           |  |          |  |
|-----------|--|----------|--|
| Ribose    |  | Fructose |  |
| Arabinose |  | Sorbose  |  |
| Xylose    |  | Psicose  |  |
| Lyxose    |  | Tagatose |  |

**Ketoses**

**Sialic Acids:**

|        |  |
|--------|--|
| Neu5Ac |  |
| Neu5Gc |  |
| KDN    |  |

**Ulosonic acids:**

|                         |  |
|-------------------------|--|
| Pseudaminic acid        |  |
| Legionaminic acid       |  |
| 8-Epi-legionaminic acid |  |
| 4-Epi-legionaminic acid |  |

**Other:**

|         |  |
|---------|--|
| KDO     |  |
| KO      |  |
| Heptose |  |

**All Hexoses are, by default, in the pyranose form, D-Configuration**

**All 6-deoxy sugars are in pyranose, L-configuration**  
**If clarification is needed, do as below:**

|                                                         |          |          |  |
|---------------------------------------------------------|----------|----------|--|
| Sugar is in furanose form:<br>(Draw inside sugar)       | <i>f</i> | Example: |  |
| Hexose is in L-form:<br>(Draw to bottom-left of sugar)  | <i>L</i> | Example: |  |
| 6-Deoxy is in D-form:<br>(Draw to bottom-left of sugar) | <i>D</i> | Example: |  |

**Supplementary Figure 5. Extended symbol nomenclature for bacterial glycans.** Shown is a symbol nomenclature developed by the CFG for notation of bacterial polysaccharides. It is based on the existing nomenclature adopted by the CFG and the textbook, *Essentials of Glycobiology* for representation of mammalian glycans. In order to accommodate the diversity of bacterial glycans present in O-antigens, it was necessary to add an additional 39 symbols with a total of 71 unique carbohydrates are represented. This nomenclature is viewed as a draft symbol nomenclature for representation of diverse microbial glycans. However, it is useful to visually identify common epitopes recognized by antibodies/antisera in glycans from different species (e.g. see **Supplementary Figure 4**).

## Supplementary Figure 6

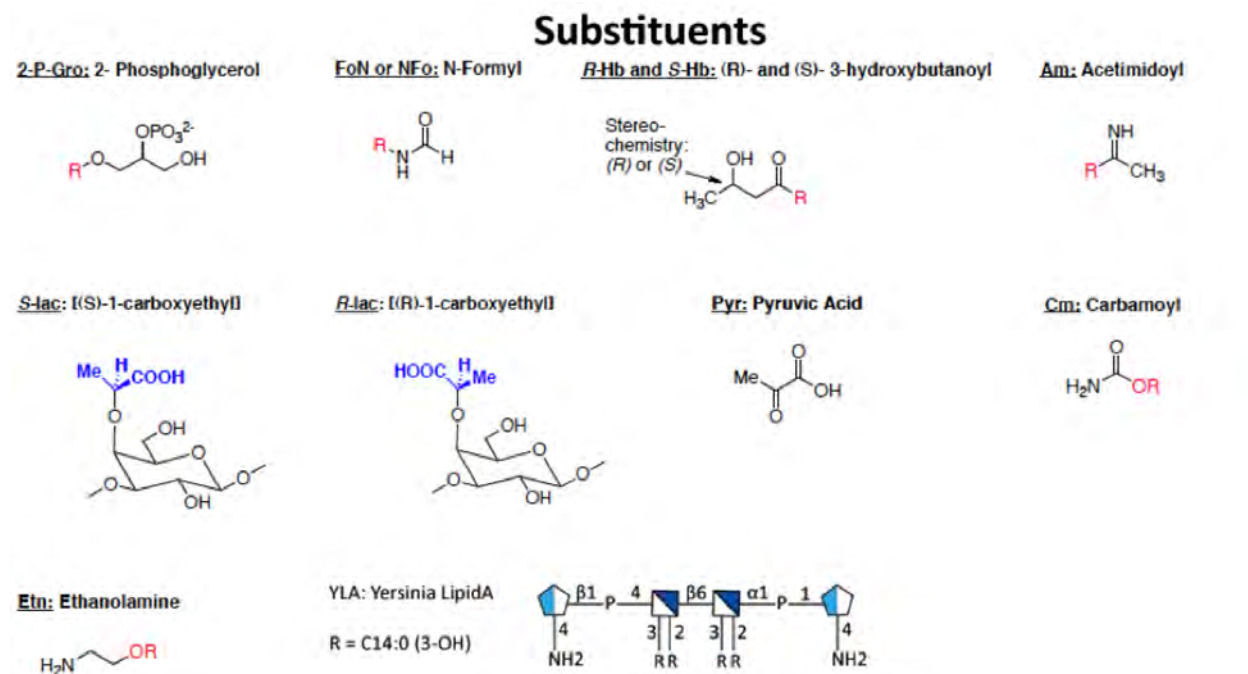

**Supplementary Figure 6. Additional substituents for bacterial glycans.** Additional substituents of bacterial antigenic structures depicted in **Supplementary Figure 4** or in **Supplementary Table 1** are defined. This is additional to symbol nomenclature developed by the CFG for notation of bacterial polysaccharides.

## Supplementary Figure 7

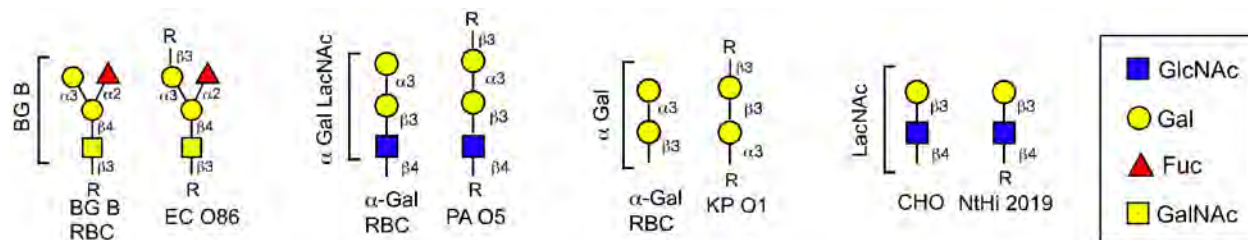

**Supplementary Figure 7. Carbohydrate determinants on eukaryotic cells vs. targeted bacterial strains.** Schematic representation of self-like antigens targeted by galectins on various microbes, paired with similar structures found on indicated eukaryotic cells. BG B = blood group B.

**Supplementary Data 1.** Excel files containing data obtained following analysis of binding on the MGMv1.

**Supplementary Data 2.** Excel files containing data obtained following analysis of binding on the mammalian glycan microarray.

**Supplementary Data 3.** Excel files containing data obtained following analysis of binding on the expanded MGM.

**Supplementary Table 1. Bacterial species represented on the MGM.** The published names and a partial list of structures are shown for bacterial species included on the MGM. References for each of the shown structure are included with this table. The first 48 structures listed are those included on the original MGM as indicated by the table legend. A more detailed source of microbial glycan determinants can be found at <http://csdb.glycoscience.ru/bacterial/>



Supplementary Table 1

| BPS Chart # | Genus              | Species            | Subtype   | Additional                  | Symbol                                                                                | Ref.    |
|-------------|--------------------|--------------------|-----------|-----------------------------|---------------------------------------------------------------------------------------|---------|
| 1           | <i>Pseudomonas</i> | <i>aeruginosa</i>  | O1        | IATS1, FI 4                 | 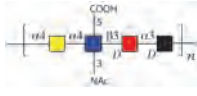   | (1)     |
| 2           | <i>Pseudomonas</i> | <i>aeruginosa</i>  | O2a, 2c   | IATS2-FI 3                  |    | (1)     |
| 3           | <i>Pseudomonas</i> | <i>aeruginosa</i>  | O13a, 13b | IATS13, Sandvik serotype II |    | (1)     |
| 4           | <i>Pseudomonas</i> | <i>aeruginosa</i>  | O9a, 9d   |                             |    | (2)     |
| 5           | <i>Shigella</i>    | <i>boydii</i>      | type2     |                             |    | (3)     |
| 6           | <i>Shigella</i>    | <i>boydii</i>      | type4     |                             |  | (4, 5)  |
| 7           | <i>Shigella</i>    | <i>boydii</i>      | type10    |                             |  | (6)     |
| 8           | <i>Shigella</i>    | <i>dysenteriae</i> | type3     |                             |  | (7)     |
| 9           | <i>Shigella</i>    | <i>dysenteriae</i> | type8     |                             |  | (5)     |
| 10          | <i>Shigella</i>    | <i>dysenteriae</i> | type11    |                             |  | (8, 9)  |
| 11          | <i>Shigella</i>    | <i>dysenteriae</i> | type13    |                             |  | (6, 10) |
| 12          | <i>Escherichia</i> | <i>coli</i>        | O29:H10   |                             |  | (7)     |

| BPS Chart # | Genus       | Species    | Subtype     | Additional | Symbol | Ref.     |
|-------------|-------------|------------|-------------|------------|--------|----------|
| 13          | Escherichia | coli       | O40         |            |        | (11)     |
| 14          | Escherichia | coli       | O106        |            |        | (12)(12) |
| 15          | Escherichia | coli       | O130        |            |        | (13)     |
| 16          | Escherichia | coli       | O148        |            |        | (14)     |
| 17          | Escherichia | coli       | O150:H6     |            |        | (15)     |
| 18          | Escherichia | coli       | O180        |            |        | (6, 10)  |
| 19          | Proteus     | mirabilis  | O3a, 3c     | G1         |        | (16)     |
| 20          | Proteus     | mirabilis  | O8          | TG326      |        | (17)     |
| 21          | Proteus     | mirabilis  | O10         | HJ4320     |        | (18)     |
| 22          | Proteus     | mirabilis  | O29a, 29b   |            |        | (19)     |
| 23          | Proteus     | mirabilis  | O50         | TG332      |        | (20)     |
| 24          | Proteus     | mirabilis  | O54a, 54b   |            |        | (21)     |
| 25          | Pseudomonas | aeruginosa | O2a, 2b     | IATS16     |        | (1)      |
| 26          | Pseudomonas | aeruginosa | O2a, 2b, 2e |            |        | (1)      |

| BPS Chart # | Genus       | Species    | Subtype     | Additional | Symbol | Ref. |
|-------------|-------------|------------|-------------|------------|--------|------|
| 27          | Pseudomonas | aeruginosa | O2a, 2d     | IATS5      |        | (1)  |
| 28          | Pseudomonas | aeruginosa | O2          | FI 7       |        | (1)  |
| 29          | Pseudomonas | aeruginosa | O3a, 3b     |            |        | (1)  |
| 30          | Pseudomonas | aeruginosa | O3a, 3b, 3c | IATS3      |        | (1)  |
| 31          | Pseudomonas | aeruginosa | O3a, 3d     |            |        | (1)  |
| 32          | Pseudomonas | aeruginosa | O4a, 4c     |            |        | (1)  |
| 33          | Pseudomonas | aeruginosa | O6a         | IATS6      |        | (1)  |
| 34          | Pseudomonas | aeruginosa | O6a, 6c     |            |        | (1)  |
| 35          | Pseudomonas | aeruginosa | O6          | FI 1       |        | (1)  |
| 36          | Pseudomonas | aeruginosa | O10a, 10b   | IATS10-FI5 |        | (1)  |
| 37          | Pseudomonas | aeruginosa | O10a, 10c   | IATS19     |        | (1)  |
| 38          | Pseudomonas | aeruginosa | O11a, 11b   | IATS11-FI2 |        | (1)  |



| BPS Chart # | Genus   | Species   | Subtype        | Additional | Symbol                                                                                | Ref. |
|-------------|---------|-----------|----------------|------------|---------------------------------------------------------------------------------------|------|
| 51          | Proteus | penneri   | O64a, 64b, 64c |            | 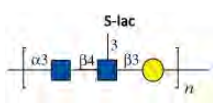   | (30) |
| 52          | Proteus | penneri   | O66            | 2          |    | (31) |
| 53          | Proteus | penneri   | O69            |            |    | (32) |
| 54          | Proteus | penneri   | O71            | 42         |    | (33) |
| 55          | Proteus | vulgaris  | O4             | PrK 9/57   |   | (34) |
| 56          | Proteus | vulgaris  | O12            | PrK 25/57  |  | (35) |
| 57          | Proteus | vulgaris  | O13            | 8344       |  | (36) |
| 58          | Proteus | vulgaris  | O15            | PrK 30/57  |  | (37) |
| 59          | Proteus | vulgaris  | O17            | PrK 33/57  |  | (32) |
| 60          | Proteus | vulgaris  | O19a           | PrK 37/57  |  | (38) |
| 61          | Proteus | mirabilis | O6             | PrK 14/57  |  | (39) |

| BPS Chart # | Genus       | Species       | Subtype     | Additional | Symbol                                                                                | Ref.     |
|-------------|-------------|---------------|-------------|------------|---------------------------------------------------------------------------------------|----------|
| 62          | Proteus     | mirabilis     | O11         | PrK 24/57  | 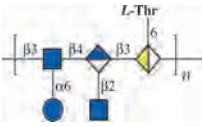   | (40)     |
| 63          | Proteus     | mirabilis     | O13         | PrK 26/57  |    | (36)     |
| 64          | Proteus     | myxofaciens   | O60         |            |    | (21)     |
| 65          | Proteus     | genomospecies | O56         |            |    | (41)     |
| 66          | Providencia | stuartii      | O4          |            |    | (42)     |
| 67          | Providencia | stuartii      | O43         |            |  | (43)     |
| 68          | Providencia | stuartii      | O47         |            |  | (44)     |
| 69          | Providencia | stuartii      | O47 (Core9) |            |                                                                                       | (44)     |
| 70          | Providencia | stuartii      | O49         |            |  | (45)     |
| 71          | Providencia | stuartii      | O57         |            |  | (44)     |
| 72          | Providencia | alcalifaciens | O23         |            |  | (27, 46) |
| 73          | Providencia | alcalifaciens | O27         |            |  | (43)     |



| BPS Chart # | Genus       | Species       | Subtype     | Additional | Symbol                                                                                | Ref.    |
|-------------|-------------|---------------|-------------|------------|---------------------------------------------------------------------------------------|---------|
| 74          | Providencia | alcalifaciens | O29         |            | 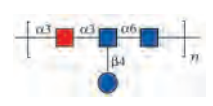   | (47)    |
| 75          | Providencia | alcalifaciens | O30         |            |    | (48)    |
| 76          | Providencia | alcalifaciens | O32         |            |    | (49)    |
| 77          | Providencia | alcalifaciens | O39         |            |    | (8)     |
| 78          | Providencia | rustigianni   | O16         |            |    | (49)    |
| 79          | Providencia | rustigianni   | O34         |            |   | (50)    |
| 80*         | Yersinia    | pestis        | KM260-ΔO187 |            |  | (51)    |
| 81*         | Yersinia    | pestis        | KM260-Δrfe  |            |  | (6, 10) |
| 82*         | Yersinia    | pestis        | 1146-25     |            |  | (52)    |
| 83*         | Yersinia    | pestis        | 1146-37     |            |  | (52)    |

| BPS Chart # | Genus       | Species     | Subtype  | Additional | Symbol                                                                                | Ref.   |
|-------------|-------------|-------------|----------|------------|---------------------------------------------------------------------------------------|--------|
| 84*         | Yersinia    | pestis      | KM218-37 |            |    | (52)   |
| 85*         | Yersinia    | pestis      | KM260-25 |            |    | (52)   |
| 86          | Francisella | novicida    |          |            |    | (53)   |
| 87          | Francisella | tularensis  |          |            |   | (54)   |
| 88          | Klebsiella  | pneumoniae  | O1       |            |  | (55)   |
| 89          | Klebsiella  | pneumoniae  | O2a      |            |  | (55)   |
| 90          | Klebsiella  | pneumoniae  | O2a,2c   |            |  | (55)   |
| 91          | Klebsiella  | pneumoniae  | O4       |            |  | (55)   |
| 92          | Shigella    | boydii      | Type3    |            |  | (6, 9) |
| 93          | Shigella    | boydii      | Type5    |            |  | (56)   |
| 94          | Shigella    | dysenteriae | Type4    |            |  | (57)   |

| BPS Chart # | Genus       | Species               | Subtype  | Additional   | Symbol | Ref. |
|-------------|-------------|-----------------------|----------|--------------|--------|------|
| 95          | Shigella    | dysenteriae           | Type5    |              |        | (5)  |
| 96          | Shigella    | dysenteriae           | Type6    |              |        | (5)  |
| 97*         | Salmonella  | typhimurium           | SL 1181  |              |        | (58) |
| 98*         | Salmonella  | typhimurium           | TV 119   |              |        | (59) |
| 99*         | Salmonella  | typhimurium           | SL 684   |              |        | (59) |
| 100         | Salmonella  | typhimurium           |          |              |        | (60) |
| 101         | Serratia    | marcescens            | Bizio    |              |        | (61) |
| 102         | Escherichia | coli                  | K235     |              |        | (62) |
| 103         | Escherichia | coli                  | O128-B12 |              |        | (63) |
| 104         | Salmonella  | enterica abortus equi |          |              |        | (64) |
| 105         | Salmonella  | typhosa               |          | ATCC - 10749 |        | (65) |
| 106         | Salmonella  | enteritidis           |          | ATCC - 13076 |        | (66) |
| 107         | Proteus     | vulgaris              | O1       | 18984        |        | (67) |

| BPS Chart # | Genus       | Species       | Subtype     | Additional | Symbol | Ref.    |
|-------------|-------------|---------------|-------------|------------|--------|---------|
| 108         | Proteus     | vulgaris      | O21         | PrK 39/57  |        | (68)    |
| 109         | Proteus     | vulgaris      | O34         | 4669       |        | (69)    |
| 110         | Proteus     | mirabilis     | O51         | 19011      |        | (70)    |
| 111         | Providencia | stuartii      | O20         |            |        | (71)    |
| 112         | Providencia | alcalifaciens | O6          |            |        | (72)    |
| 113         | Providencia | alcalifaciens | O19         | LPS        |        | (25)    |
| 114         | Providencia | alcalifaciens | O19         | LPS-NaOH   |        | (25)    |
| 115         | Providencia | alcalifaciens | O36         |            |        | (73)    |
| 116*        | Yersinia    | pestis        | KM260-ΔO187 | LPS        |        | (10)    |
| 117*        | Yersinia    | pestis        | KM260-Δrfe  | LPS        |        | (6, 10) |

| BPS Chart # | Genus    | Species | Subtype                   | Additional | Symbol                                                                                | Ref.    |
|-------------|----------|---------|---------------------------|------------|---------------------------------------------------------------------------------------|---------|
| 118*        | Yersinia | pestis  | 1146-25                   | LPS        | 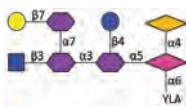   | (52)    |
| 119*        | Yersinia | pestis  | 1146-37                   | LPS        |    | (52)    |
| 120*        | Yersinia | pestis  | KM218-37                  | LPS        |    | (74)    |
| 121*        | Yersinia | pestis  | KM218-25                  |            |    | (52)    |
| 122*        | Yersinia | pestis  | KM260 (11)- $\Delta$ pmrF |            |  | (10)    |
| 123*        | Yersinia | pestis  | KM260 (11)- $\Delta$ 0186 |            |  | (6, 10) |
| 124*        | Yersinia | pestis  | KM260 (11)- $\Delta$ waaQ |            |  | (6, 10) |
| 125*        | Yersinia | pestis  | KM260 (11)- $\Delta$ waaL |            |  | (6, 10) |





| BPS Chart # | Genus         | Species     | Subtype | Additional | Symbol                                                                                | Ref.     |
|-------------|---------------|-------------|---------|------------|---------------------------------------------------------------------------------------|----------|
| 137         | Shigella      | dysenteriae | Type2   |            | 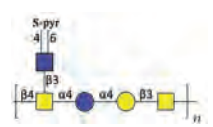   | (77)     |
| 138         | Escherichia   | coli        | O111:B4 |            |    | (59)     |
| 139         | Escherichia   | coli        | O26:B6  |            |    | (63)     |
| 140         | Escherichia   | coli        | O55:B5  |            |    | (78)     |
| 141         | Escherichia   | coli        | O127:B8 |            |    | (63)     |
| 142         | Streptococcus | pneumoniae  | 1       |            |    | (79)     |
| 143         | Streptococcus | pneumoniae  | 2       |            |  | (80, 81) |
| 144         | Streptococcus | pneumoniae  | 3       |            |  | (82)     |
| 145         | Streptococcus | pneumoniae  | 4       |            |  | (83)     |
| 146         | Streptococcus | pneumoniae  | 5       |            |  | (84)     |
| 147         | Streptococcus | pneumoniae  | 8       |            |  | (85, 86) |
| 148         | Streptococcus | pneumoniae  | 9       |            |  | (87)     |
| 149         | Streptococcus | pneumoniae  | 12      |            |  | (88, 89) |

| BPS Chart # | Genus         | Species    | Subtype | Additional | Symbol | Ref.      |
|-------------|---------------|------------|---------|------------|--------|-----------|
| 150         | Streptococcus | pneumoniae | 14      |            |        | (81, 90)  |
| 151         | Streptococcus | pneumoniae | 17      |            |        | (91, 92)  |
| 152         | Streptococcus | pneumoniae | 19      |            |        | (93)      |
| 153         | Streptococcus | pneumoniae | 20      |            |        | (94, 95)  |
| 154         | Streptococcus | pneumoniae | 22      |            |        | (96)      |
| 155         | Streptococcus | pneumoniae | 23      |            |        | (97)      |
| 156         | Streptococcus | pneumoniae | 26      |            |        | (81)      |
| 157         | Streptococcus | pneumoniae | 34      |            |        | (98)      |
| 158         | Streptococcus | pneumoniae | 43      |            |        | (85, 99)  |
| 159         | Streptococcus | pneumoniae | 51      |            |        | (85)      |
| 160         | Streptococcus | pneumoniae | 54      |            |        | (100)     |
| 161         | Streptococcus | pneumoniae | 56      |            |        | (81, 101) |

| BPS Chart # | Genus         | Species     | Subtype                             | Additional        | Symbol | Ref.  |
|-------------|---------------|-------------|-------------------------------------|-------------------|--------|-------|
| 162         | Streptococcus | pneumoniae  | 57                                  |                   |        | (85)  |
| 163         | Streptococcus | pneumoniae  | 68                                  |                   |        | (102) |
| 164         | Streptococcus | pneumoniae  | 70                                  |                   |        | (103) |
| 165         | Providencia   | stuartii    | O49                                 | Core Linked       |        | (45)  |
| 166         | Providencia   | stuartii    | O52                                 |                   |        | (104) |
| 167         | Pseudomonas   | aeruginosa  | O4 (Habs serotype 4)                | (Habs serotype 4) |        | (105) |
| 168         | Pseudomonas   | aeruginosa  | O6a (Habs serotype 6, fraction IIa) |                   |        | (1)   |
| 169         | Pseudomonas   | aeruginosa  | O6a (Habs serotype 6, fraction IIb) |                   |        | (1)   |
| 170         | Pseudomonas   | aeruginosa  | O10                                 |                   |        | (106) |
| 171         | Salmonella    | typhimurium | dodeca saccharid e                  |                   |        | (107) |
| 172         | Salmonella    | enteritidis | dodeca saccharid e                  |                   |        | (108) |
| 173         | Proteus       | penneri     | O72a, 72b (4)                       |                   |        | (109) |
| 174         | Pseudomonas   | aeruginosa  | O2 (2a),2d,2f                       |                   |        | (1)   |
| 175         | Pseudomonas   | aeruginosa  | O7 7a,7b,7c                         |                   |        | (1)   |
| 176         | Pseudomonas   | aeruginosa  | O7 7a,7b,7d                         |                   |        | (110) |
| 177         | Pseudomonas   | aeruginosa  | O7 7a,7d                            |                   |        | (110) |
| 178         | Proteus       | vulgaris    | O22                                 | (PrK 40/57)       |        | (111) |
| 179         | Proteus       | vulgaris    | O25                                 | (PrK 48/57)       |        | (112) |
| 180         | Proteus       | vulgaris    | O37a,b                              | (PrK 63/57)       |        | (113) |
| 181         | Proteus       | vulgaris    | O37a,c                              | (PrK 72/57)       |        | (113) |
| 182         | Proteus       | vulgaris    | O44                                 | (PrK 67/57)       |        | (114) |
| 183         | Proteus       | vulgaris    | O45                                 | (4680)            |        | (115) |

| BPS Chart # | Genus    | Species   | Subtype                  | Additional   | Symbol | Ref.  |
|-------------|----------|-----------|--------------------------|--------------|--------|-------|
| 184         | Proteus  | vulgaris  | O53                      | (TG 276-10)  |        | (109) |
| 185         | Proteus  | vulgaris  | O54a,54c                 | (TG 103)     |        | (21)  |
| 186         | Proteus  | vulgaris  | O55                      | (TG 155)     |        | (109) |
| 187         | Proteus  | vulgaris  | O65                      | (TG 251)     |        | (116) |
| 188         | Proteus  | mirabilis | O14a,14b                 | (PrK 29/57)  |        | (117) |
| 189         | Proteus  | mirabilis | O16                      | (4652)       |        | (118) |
| 190         | Proteus  | mirabilis | O17                      | (PrK 32/57)  |        | (119) |
| 191         | Proteus  | mirabilis | O23a,b,d                 | (PrK 42/57)  |        | (109) |
| 192         | Proteus  | mirabilis | O26                      | (PrK 49/57)  |        | (120) |
| 193         | Proteus  | mirabilis | O27                      | (PrK 50/57)  |        | (121) |
| 194         | Proteus  | mirabilis | O28                      | (PrK 51/57)  |        | (122) |
| 195         | Proteus  | mirabilis | O29a                     | (PrK 52/57)  |        | (109) |
| 196         | Proteus  | mirabilis | O40                      | (10703)      |        | (123) |
| 197         | Proteus  | mirabilis | O41                      | (PrK 67/57)  |        | (124) |
| 198         | Proteus  | mirabilis | O74                      | (10705, OF)  |        | (109) |
| 199         | Proteus  | mirabilis | O75                      | (10702, OC)  |        | (109) |
| 200         | Proteus  | mirabilis | O77 (3 B-m)              |              |        | (109) |
| 201         | Proteus  | penneri   | O31a (26)                |              |        | (109) |
| 202         | Proteus  | penneri   | O52 (15)                 |              |        | (109) |
| 203         | Proteus  | penneri   | O58 (12)                 |              |        | (109) |
| 204         | Proteus  | penneri   | O59 (9)                  |              |        | (109) |
| 205         | Proteus  | penneri   | O61 (21)                 |              |        | (109) |
| 206         | Proteus  | penneri   | O62 (41)                 |              |        | (109) |
| 207         | Proteus  | penneri   | O63 (22)                 |              |        | (109) |
| 208         | Proteus  | penneri   | O64a,b,c (27)            |              |        | (109) |
| 209         | Proteus  | penneri   | O65 (34)                 |              |        | (116) |
| 210         | Proteus  | penneri   | O67 (8)                  |              |        | (109) |
| 211         | Proteus  | penneri   | O68 (63)                 |              |        | (109) |
| 212         | Proteus  | penneri   | O70 (60)                 |              |        | (125) |
| 213         | Proteus  | penneri   | O73a,b (103)             |              |        | (109) |
| 214         | Yersinia | pestis    | KM218-25                 |              |        | (126) |
| 215         | Yersinia | pestis    | KM260(11)- $\Delta$ pnrF |              |        | (127) |
| 216         | Yersinia | pestis    | KM260(11)- $\Delta$ O186 |              |        | (127) |
| 217         | Yersinia | pestis    | KM260(11)- $\Delta$ waaQ |              |        | (127) |
| 218         | Yersinia | pestis    | KM260(11)-37             |              |        | (127) |
| 219         | Yersinia | pestis    | KIMD1-37                 |              |        |       |
| 220         | Yersinia | Pestis    | KIMD1-25                 |              |        |       |
| 221         | Proteus  | mirabilis | O23a, 23b, 23c           | (CCUG 10701) |        | (109) |
| 222         | Yersinia | pestis    | 260(11)-37C-417          |              |        | (127) |
| 223         | Yersinia | pestis    | P-1680-25C               |              |        |       |
| 224         | Yersinia | pestis    | I-2377-25C               |              |        | (128) |

| BPS Chart # | Genus       | Species     | Subtype              | Additional | Symbol                                                                                | Ref.  |
|-------------|-------------|-------------|----------------------|------------|---------------------------------------------------------------------------------------|-------|
| 225         | Yersinia    | pestis      | I-2377-37C           |            |                                                                                       | (128) |
| 226         | Klebsiella  | pneumoniae  | O3                   | OPS        |                                                                                       | (55)  |
| 227         | Klebsiella  | pneumoniae  | O5                   | OPS        |                                                                                       | (55)  |
| 228         | Klebsiella  | pneumoniae  | O8                   | OPS        | 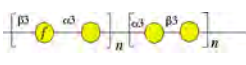    | (110) |
| 229         | Klebsiella  | pneumoniae  | O12                  | OPS        |                                                                                       | (55)  |
| 230         | Shigella    | boydii      | type 9               |            |                                                                                       | (129) |
| 231         | Shigella    | boydii      | type 11              |            |                                                                                       | (130) |
| 232         | Shigella    | boydii      | type 12              |            |                                                                                       | (110) |
| 233         | Shigella    | boydii      | type 15              |            |                                                                                       | (131) |
| 234         | Shigella    | boydii      | type 16              |            |                                                                                       | (131) |
| 235         | Shigella    | boydii      | type 17              |            |                                                                                       | (132) |
| 236         | Shigella    | boydii      | type 18              |            |                                                                                       | (133) |
| 237         | Escherichia | coli        | O49                  |            |    | (134) |
| 238         | Escherichia | coli        | O52                  |            |                                                                                       | (135) |
| 239         | Escherichia | coli        | O58                  |            |                                                                                       | (136) |
| 240         | Escherichia | coli        | O73                  |            |    | (137) |
| 241         | Escherichia | coli        | O112ab               |            |  | (138) |
| 242         | Escherichia | coli        | O118                 |            |                                                                                       | (139) |
| 243         | Escherichia | coli        | O125                 |            |  | (140) |
| 244         | Escherichia | coli        | O151                 |            |                                                                                       | (139) |
| 245         | Escherichia | coli        | O168                 |            |  | (141) |
| 246         | Shigella    | dysenteriae | type 7               |            |                                                                                       | (142) |
| 247         | Shigella    | dysenteriae | type 8 (Russian)     |            |                                                                                       | (110) |
| 248         | Shigella    | dysenteriae | type 9               |            |                                                                                       | (110) |
| 249         | Yersinia    | pestis      | KM218-6C             |            |                                                                                       | (126) |
| 250         | Yersinia    | Pestis      | KM260(11)-yjhW-6C    |            |                                                                                       | (127) |
| 251         | Yersinia    | pestis      | KM260(11)-wabD/wa aL |            |                                                                                       | (127) |
| 252         | Yersinia    | pestis      | KM260(11)-wabC/wa aL |            |                                                                                       | (127) |

| BPS Chart # | Genus       | Species            | Subtype      | Additional  | Symbol                                                                               | Ref.  |
|-------------|-------------|--------------------|--------------|-------------|--------------------------------------------------------------------------------------|-------|
| 253         | Yersinia    | pseudotuberculosis | 85pCad-37C   |             |                                                                                      |       |
| 254         | Yersinia    | pseudotuberculosis | 85pCad-20C   |             |                                                                                      |       |
| 255         | Yersinia    | pseudotuberculosis | O:2a         |             |                                                                                      | (143) |
| 256         | Yersinia    | pseudotuberculosis | O:2a-dhmA    |             |                                                                                      | (144) |
| 257         | Yersinia    | pseudotuberculosis | O:2c         |             |                                                                                      | (145) |
| 258         | Yersinia    | pseudotuberculosis | O:3          |             |                                                                                      | (145) |
| 259         | Yersinia    | pseudotuberculosis | O:4b         |             |                                                                                      | (146) |
| 260         | Proteus     | vulgaris           | O2 (OX2)     |             |                                                                                      | (147) |
| 261         | Proteus     | mirabilis          | O3ab (S1959) |             |                                                                                      | (147) |
| 262         | Proteus     | mirabilis          | O5           | (PrK 12/57) |                                                                                      | (5)   |
| 263         | Proteus     | mirabilis          | O9           | (PrK 18/57) |                                                                                      | (148) |
| 264         | Proteus     | mirabilis          | O11 (9B-m)   |             |                                                                                      | (40)  |
| 265         | Proteus     | penneri            | O17 (16)     |             |                                                                                      | (109) |
| 266         | Proteus     | mirabilis          | O18          | (PrK 34/57) |                                                                                      | (149) |
| 267         | Proteus     | Mirabilis          | O20          | (PrK 38/57) |                                                                                      | (109) |
| 268         | Proteus     | penneri            | O31ab (28)   |             |                                                                                      | (109) |
| 269         | Proteus     | mirabilis          | O33 (D52)    |             |                                                                                      | (150) |
| 270         | Proteus     | mirabilis          | O43          | (PrK 69/57) |                                                                                      | (151) |
| 271         | Proteus     | vulgaris           | O47          | (PrK 73/57) | 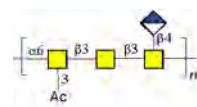 | (109) |
| 272         | Proteus     | mirabilis          | O49          | (PrK 75/57) |                                                                                      | (152) |
| 273         | Proteus     | mirabilis          | O54ab (OE)   |             |                                                                                      | (109) |
| 274         | Proteus     | penneri            | O73ac (75)   |             |                                                                                      | (109) |
| 275         | Proteus     | vulgaris           | O76(HSC 438) |             |                                                                                      | (109) |
| 276         | Shigella    | flexneri           | type 1a      |             |                                                                                      | (153) |
| 277         | Shigella    | flexneri           | type 1b      |             |                                                                                      | (154) |
| 278         | Shigella    | flexneri type      | 2a           |             |                                                                                      | (155) |
| 279         | Shigella    | flexneri           | type 2b      |             |                                                                                      | (154) |
| 280         | Shigella    | flexneri           | type 3a      |             |                                                                                      | (154) |
| 281         | Shigella    | flexneri           | type 3b      |             |                                                                                      | (154) |
| 282         | Shigella    | flexneri           | type 4a      |             |                                                                                      | (154) |
| 283         | Shigella    | flexneri           | type 4b      |             |                                                                                      | (154) |
| 284         | Shigella    | flexneri           | type 5b      |             |                                                                                      | (5)   |
| 285         | Shigella    | flexneri           | type 6a      |             |                                                                                      | (156) |
| 286         | Shigella    | flexneri           | type 6       |             |                                                                                      | (154) |
| 287         | Shigella    | flexneri           | type X       |             |                                                                                      | (154) |
| 288         | Shigella    | dysenteriae        | type 1       |             |                                                                                      | (156) |
| 289         | Shigella    | boydii             | type 6       |             |                                                                                      | (6)   |
| 290         | Shigella    | boydii             | type 7       |             |                                                                                      | (110) |
| 291         | Shigella    | boydii             | type 8       |             |                                                                                      | (110) |
| 292         | Shigella    | boydii             | type 13      |             |                                                                                      | (157) |
| 293         | Shigella    | boydii             | type 14      |             |                                                                                      | (5)   |
| 294         | Escherichia | coli               | O71          |             |                                                                                      | (158) |
| 295         | Escherichia | coli               | O85          |             |                                                                                      | (159) |
| 296         | Escherichia | coli               | O99          |             |                                                                                      | (160) |
| 297         | Escherichia | coli               | O145         |             |                                                                                      | (161) |
| 298         | Escherichia | coli               | O107         |             |                                                                                      | (162) |
| 299         | Salmonella  | enterica           | O17          |             |                                                                                      | (159) |



| BPS Chart # | Genus      | Species  | Subtype | Additional | Symbol | Ref.  |
|-------------|------------|----------|---------|------------|--------|-------|
| 300         | Salmonella | enterica | O28     |            |        | (158) |
| 301         | Salmonella | enterica | O47     |            |        | (163) |
| 302         | Salmonella | enterica | O55     |            |        | (164) |

Legend:

- Chart #1 to 48 represent Microbial Glycan Microarray (MGM)
- Chart #1 to 302 represent expanded Microbial Glycan Microarray (MGM)
- All symbol nomenclature and substituents can be found in Figure S8 and S9

\* Structures are variable core regions and not O-antigen repeats

SLA = Salmonella LipidA

YLA = Yersinia LipidA

## References

1. Knirel YA, Bystrova OV, Kocharova NA, Zahringer U, Pier GB. Conserved and variable structural features in the lipopolysaccharide of *Pseudomonas aeruginosa*. *J Endotoxin Res.* 2006;12(6):324-36.
2. Knirel YA, Kocharova NA, Shashkov AS, Kochetkov NK, Kholodkova EV, Stanislavsky ES. Somatic antigens of *Pseudomonas aeruginosa*. The structure of O-specific polysaccharide chains of the lipopolysaccharides from *P. aeruginosa* II (Sandvik) and V (IM-1, Verder-Evans). *Eur J Biochem.* 1987;166(1):189-97.
3. L'Vov V L, Dashunin VM, Ramos EL, Shashkov AS, Dmitriev BA, Kochetkov NK. Somatic antigens of *Shigella*: the structure of the polysaccharide chain of *Shigella boydii* type 2 lipopolysaccharide. *Carbohydr Res.* 1983;124(1):141-9.
4. Wang L, Qu W, Reeves PR. Sequence analysis of four *Shigella boydii* O-antigen loci: implication for *Escherichia coli* and *Shigella* relationships. *Infect Immun.* 2001;69(11):6923-30. PMID: 100072.
5. Knirel YA, Kochetkov NK. The structure of lipopolysaccharides of gram-negative bacteria. III. The structure of O-antigens. *Biochemistry (Moscow).* 1994;59:1325-83.
6. Senchenkova SN, Feng L, Yang J, Shashkov AS, Cheng J, Liu D, et al. Structural and genetic characterization of the *Shigella boydii* type 10 and type 6 O antigens. *J Bacteriol.* 2005;187(7):2551-4. PMID: 1065213.
7. Jonsson KH, Weintraub A, Widmalm G. Structural studies of the O-antigenic polysaccharides from *Shigella dysenteriae* type 3 and *Escherichia coli* O124, a reinvestigation. *Carbohydr Res.* 2006;341(18):2986-9.
8. Turnbaugh PJ, Ley RE, Hamady M, Fraser-Liggett CM, Knight R, Gordon JI. The human microbiome project. *Nature.* 2007;449(7164):804-10.
9. Liu B, Knirel YA, Feng L, Perepelov AV, Senchenkova SN, Wang Q, et al. Structure and genetics of *Shigella* O antigens. *FEMS Microbiol Rev.* 2008;32(4):627-53.
10. Wang Q, Perepelov AV, Beutin L, Senchenkova SN, Xu Y, Shashkov AS, et al. Structural and genetic characterization of the *Escherichia coli* O180 O antigen and identification of a UDP-GlcNAc 6-dehydrogenase. *Glycobiology.* 2012;22(10):1321-31.
11. Zhao G, Perepelov AV, Senchenkova SN, Shashkov AS, Feng L, Li X, et al. Structural relation of the antigenic polysaccharides of *Escherichia coli* O40, *Shigella dysenteriae* type 9, and *E. coli* K47. *Carbohydr Res.* 2007;342(9):1275-9.
12. Moran AP, Prendergast MM, Appelmelk BJ. Molecular mimicry of host structures by bacterial lipopolysaccharides and its contribution to disease. *FEMS Immunol Med Microbiol.* 1996;16(2):105-15.
13. Perepelov AV, Lu B, Senchenkova SN, Shevelev SD, Wang W, Shashkov AS, et al. The Structure of the Glycerophosphate-Containing O-Specific Polysaccharide from *Escherichia coli* O130. *Russian J Bioorg Chem.* 2007;33(1):57-60.
14. Feng L, Perepelov AV, Zhao G, Shevelev SD, Wang Q, Senchenkova SN, et al. Structural and genetic evidence that the *Escherichia coli* O148 O antigen is the precursor of the *Shigella dysenteriae* type 1 O antigen and identification of a glucosyltransferase gene. *Microbiology.* 2007;153(Pt 1):139-47.
15. Perepelov AV, Han W, Senchenkova SN, Shevelev SD, Shashkov AS, Feng L, et al. Structure of the O-polysaccharide of *Escherichia coli* O150 containing 2-acetamido-4-O-[(S)-1-carboxyethyl]-2-deoxy-D-glucose. *Carbohydr Res.* 2007;342(3-4):648-52.
16. Sidorchuk Z, Zych K, Toukach FV, Arbatsky NP, Zablotti A, Shashkov AS, et al. Structure of the O-polysaccharide and classification of *Proteus mirabilis* strain G1 in *Proteus* serogroup O3. *Eur J Biochem.* 2002;269(5):1406-12.
17. Perepelov AV, Babicka D, Shashkov AS, Arbatsky NP, Senchenkova SN, Rozalski A, et al. Structure and cross-reactivity of the O-antigen of *Proteus vulgaris* O8. *Carbohydr Res.* 1999;318(1-4):186-92.
18. St Swierzko A, Shashkov AS, Senchenkova SN, Toukach FV, Ziolkowski A, Cedzynski M, et al. Structural and serological studies of the O-specific polysaccharide of the bacterium *Proteus mirabilis* O10 containing L-altruronic acid, a new component of O-antigens. *FEBS Lett.* 1996;398(2-3):297-302.
19. Perepelov AV, Zablotti A, Shashkov AS, Knirel YA, Sidorchuk Z. Structure of the O-polysaccharide and serological studies of the lipopolysaccharide of *Proteus mirabilis* 2002. *Carbohydr Res.* 2005;340(14):2305-10.
20. Kolodziejska K, Kondakova AN, Zych K, Senchenkova SN, Shashkov AS, Knirel YA, et al. Structure of the O-polysaccharide of a serologically separate strain of *Proteus mirabilis*, TG 332, from a new proposed *Proteus* serogroup O50. *Carbohydr Res.* 2003;338(20):2105-9.
21. Kolodziejska K, Perepelov AV, Zablotti A, Drzewiecka D, Senchenkova SN, Zych K, et al. Structure of the glycerol phosphate-containing O-polysaccharides and serological studies of the lipopolysaccharides of *Proteus mirabilis* CCUG 10704 (OE) and *Proteus vulgaris* TG 103 classified into a new *Proteus* serogroup, O54. *FEMS Immunol Med Microbiol.* 2006;47(2):267-74.
22. Kocharova NA, Blaszczyk A, Zatonsky GV, Torzewska A, Bystrova OV, Shashkov AS, et al. Structure and cross-reactivity of the O-antigen of *Providencia stuartii* O18 containing 3-acetamido-3,6-dideoxy-D-glucose. *Carbohydr Res.* 2004;339(2):409-13.

23. Kocharova NA, Ovchinnikova OG, Toukach FV, Torzewska A, Shashkov AS, Knirel YA, et al. The O-polysaccharide from the lipopolysaccharide of *Providencia stuartii* O44 contains L-quinovose, a 6-deoxy sugar rarely occurring in bacterial polysaccharides. *Carbohydr Res.* 2005;340(7):1419-23.
24. Zatonsky GV, Bystrova OV, Kocharova NA, Shashkov AS, Knirel YA, Kholodkova EV, et al. Structure of a neutral O-specific polysaccharide of the bacterium *Providencia alcalifaciens* O5. *Biochemistry (Mosc).* 1999;64(5):523-7.
25. Kocharova NA, Maszewska A, Zatonsky GV, Torzewska A, Bystrova OV, Shashkov AS, et al. Structure of the O-polysaccharide of *Providencia alcalifaciens* O19. *Carbohydr Res.* 2004;339(2):415-9.
26. Kocharova NA, Maszewska A, Zatonsky GV, Bystrova OV, Ziolkowski A, Torzewska A, et al. Structure of the O-polysaccharide of *Providencia alcalifaciens* O21 containing 3-formamido-3,6-dideoxy-D-galactose. *Carbohydr Res.* 2003;338(13):1425-30.
27. Kocharova NA, Zatonsky GV, Torzewska A, Macieja Z, Bystrova OV, Shashkov AS, et al. Structure of the O-specific polysaccharide of *Providencia rustigianii* O14 containing N(epsilon)-[(S)-1-carboxyethyl]-N(alpha)-(D-galacturonoyl)-L-lysine. *Carbohydr Res.* 2003;338(9):1009-16.
28. Uhrin D, Brisson JR, MacLean LL, Richards JC, Perry MB. Application of 1D and 2D NMR techniques to the structure elucidation of the O-polysaccharide from *Proteus mirabilis* O:57. *J Biomol NMR.* 1994;4(5):615-30.
29. Knirel YA, Vinogradov EV, Shashkov AS, Sidorczyk Z, Rozalski A, Radziejewska-Lebrecht I, et al. Structural Study of O-Specific Polysaccharides of *Proteus*. *J Carbohydr Chem.* 1993;12(4-5):379-414.
30. Knirel YA, Paramonov NA, Vinogradov EV, Shashkov AS, Kochetkov NK, Sidorczyk Z, et al. Structure of the O-specific polysaccharide of *Proteus penneri* 62 containing 2-acetamido-3-O-[(S)-1-carboxyethyl]-2-deoxy-D-glucose (N-acetylisomuramic acid). *Carbohydr Res.* 1992;235:C19-23.
31. Drzewiecka D, Arbatsky NP, Shashkov AS, Staczek P, Knirel YA, Sidorczyk Z. Structure and serological properties of the O-antigen of two clinical *Proteus mirabilis* strains classified into a new *Proteus* O77 serogroup. *FEMS Immunol Med Microbiol.* 2008;54(2):185-94.
32. Kondakova AN, Toukach FV, Senchenkova SN, Arbatsky NP, Shashkov AS, Knirel YA, et al. New structures of the O-specific polysaccharides of *Proteus*. 2. Polysaccharides containing O-acetyl groups. *Biochemistry (Mosc).* 2002;67(2):201-11.
33. Knirel YA, Shashkov AS, Vinogradov EV, Swierzko A, Sidorczyk Z. The structure of the O-specific polysaccharide chain of *Proteus penneri* strain 42 lipopolysaccharide. *Carbohydr Res.* 1995;275(1):201-6.
34. Perepelov AV, Babicka D, Senchenkova SN, Shashkov AS, Moll H, Rozalski A, et al. Structure of the O-specific polysaccharide of *Proteus vulgaris* O4 containing a new component of bacterial polysaccharides, 4,6-dideoxy-4. *Carbohydr Res.* 2001;331(2):195-202.
35. Perepelov AV, Torzewska A, Shashkov AS, Senchenkova SN, Rozalski A, Knirel YA. Structure of a glycerol teichoic acid-like O-specific polysaccharide of *Proteus vulgaris* O12. *Eur J Biochem.* 2000;267(3):788-93.
36. Perepelov AV, Senchenkova SN, Cedzynski M, Ziolkowski A, Vinogradov EV, Kaca W, et al. Isolation using triflic acid solvolysis and identification of N(epsilon)-[(R)-1-carboxyethyl]-N(alpha)-(D-galacturonoyl)-L-lysine as a component of the O-specific polysaccharide of *Proteus mirabilis* O13. *Carbohydr Res.* 2000;328(3):441-4.
37. Perepelov AV, Torzewska A, Shashkov AS, Ziolkowski A, Senchenkova SN, Rozalski A, et al. Structure of the O-specific polysaccharide of *Proteus vulgaris* O15 containing a novel regioisomer of N-acetylmuramic acid, 2-acetamido-4-O-[(R)-1-carboxyethyl]-2-deoxy-D-glucose. *Carbohydr Res.* 2002;337(24):2463-8.
38. Vinogradov EV, Kaca W, Knirel YA, Rozalski A, Kochetkov NK. Structural studies on the fucosamine-containing O-specific polysaccharide of *Proteus vulgaris* O19. *Eur J Biochem.* 1989;180(1):95-9.
39. Cedzynski M, Swierzko AS, Ziolkowski A, Rozalski A, Paramonov NA, Vinogradov EV, et al. Structural and immunochemical studies of two cross-reactive *Proteus mirabilis* O-antigens, O6 and O23, containing beta1-->3-linked 2-acetamido-2-deoxy-D-glucopyranose residues. *Microbiol Immunol.* 1998;42(1):7-14.
40. Arbatsky NP, Shashkov AS, Literacka E, Widmalm G, Kaca W, Knirel YA. Structure of the O-specific polysaccharide of *Proteus mirabilis* O11, another *Proteus* O-antigen containing an amide of D-galacturonic acid with L-threonine. *Carbohydr Res.* 2000;323(1-4):81-6.
41. Zych K, Perepelov AV, Siwinska M, Knirel YA, Sidorczyk Z. Structures of the O-polysaccharides and classification of *Proteus* genomospecies 4, 5 and 6 into respective *Proteus* serogroups. *FEBS J.* 2005;272(21):5536-43.
42. Kocharova NA, Torzewska A, Zatonsky GV, Blaszczyk A, Bystrova OV, Shashkov AS, et al. Structure of the O-polysaccharide of *Providencia stuartii* O4 containing 4-(N-acetyl-L-aspart-4-yl)amino-4,6-dideoxy-D-glucose. *Carbohydr Res.* 2004;339(2):195-200.
43. Ovchinnikova OG, Bushmarinov IS, Kocharova NA, Toukach FV, Wykrota M, Shashkov AS, et al. New structure for the O-polysaccharide of *Providencia alcalifaciens* O27 and revised structure for the O-polysaccharide of *Providencia stuartii* O43. *Carbohydr Res.* 2007;342(8):1116-21.
44. Ovchinnikova OG, Kocharova NA, Bakinovskiy LV, Torzewska A, Shashkov AS, Knirel YA, et al. The structure of the O-polysaccharide from the lipopolysaccharide of *Providencia stuartii* O47. *Carbohydr Res.* 2004;339(15):2621-6.
45. Bushmarinov IS, Ovchinnikova OG, Kocharova NA, Blaszczyk A, Toukach FV, Torzewska A, et al. Structure of the O-polysaccharide of *Providencia stuartii* O49. *Carbohydr Res.* 2004;339(8):1557-60.
46. Kocharova NA, Vinogradov EV, Borisova SA, Shashkov AS, Knirel YA. Identification of N epsilon-[(R)-1-carboxyethyl]-L-lysine in, and the complete structure of, the repeating unit of the O-specific polysaccharide of *Providencia alcalifaciens* O23. *Carbohydr Res.* 1998;309(1):131-3.
47. Bushmarinov IS, Ovchinnikova OG, Kocharova NA, Toukach FV, Torzewska A, Shashkov AS, et al. Structure of the O-polysaccharide from the lipopolysaccharide of *Providencia alcalifaciens* O29. *Carbohydr Res.* 2006;341(9):1181-5.
48. Kocharova NA, Ovchinnikova OG, Torzewska A, Shashkov AS, Knirel YA, Rozalski A. The structure of the O-polysaccharide from the lipopolysaccharide of *Providencia alcalifaciens* O30. *Carbohydr Res.* 2006;341(6):786-90.
49. Bushmarinov IS, Ovchinnikova OG, Kocharova NA, Toukach FV, Torzewska A, Shashkov AS, et al. Structure of the O-polysaccharide and serological cross-reactivity of the lipopolysaccharide of *Providencia alcalifaciens* O32 containing N-acetylisomuramic acid. *Carbohydr Res.* 2007;342(2):268-73.
50. Kocharova NA, Kondakova AN, Vinogradov E, Ovchinnikova OG, Lindner B, Shashkov AS, et al. Full structure of the carbohydrate chain of the lipopolysaccharide of *Providencia rustigianii* O34. *Chemistry.* 2008;14(20):6184-91.

51. Knirel YA, Dentovskaya SV, Bystrova OV, Kocharova NA, Senchenkova SN, Shaikhutdinova RZ, et al. Relationship of the lipopolysaccharide structure of *Yersinia pestis* to resistance to antimicrobial factors. *Adv Exp Med Biol.* 2007;603:88-96.
52. Knirel YA, Lindner B, Vinogradov EV, Kocharova NA, Senchenkova SN, Shaikhutdinova RZ, et al. Temperature-dependent variations and intraspecies diversity of the structure of the lipopolysaccharide of *Yersinia pestis*. *Biochemistry.* 2005;44(5):1731-43.
53. Vinogradov E, Conlan WJ, Gunn JS, Perry MB. Characterization of the lipopolysaccharide O-antigen of *Francisella novicida* (U112). *Carbohydr Res.* 2004;339(3):649-54.
54. Prior JL, Prior RG, Hitchen PG, Diaper H, Griffin KF, Morris HR, et al. Characterization of the O antigen gene cluster and structural analysis of the O antigen of *Francisella tularensis* subsp. *tularensis*. *J Med Microbiol.* 2003;52(Pt 10):845-51.
55. Vinogradov E, Frirdich E, MacLean LL, Perry MB, Petersen BO, Duus JO, et al. Structures of lipopolysaccharides from *Klebsiella pneumoniae*. Elucidation of the structure of the linkage region between core and polysaccharide O chain and identification of the residues at the non-reducing termini of the O chains. *The Journal of biological chemistry.* 2002;277(28):25070-81.
56. L'Vov V L, Shashkov AS, Knirel YA, Arifulina AE, Senchenkova SN, Yakovlev AV, et al. Structure of the O-specific polysaccharide chain of *Shigella boydii* type 5 lipopolysaccharide: a repeated study. *Carbohydr Res.* 1995;279:183-92.
57. Rosen J, Robobi A, Nyholm PG. The conformations of the O-specific polysaccharides of *Shigella dysenteriae* type 4 and *Escherichia coli* O159 studied with molecular mechanics (MM3) filtered systematic search. *Carbohydr Res.* 2004;339(5):961-6.
58. Borrelli S, Hegedus O, Shaw DH, Jansson PE, Lindberg AA. The tetrasaccharide L-alpha-D-heptose1-->2-L-alpha-D-heptose1-->3-L-alpha-D-heptose1-->(3-deoxy-D-manno-octulosonic acid) and phosphate in lipid A define the conserved epitope in *Haemophilus* lipopolysaccharides recognized by a monoclonal antibody. *Infect Immun.* 1995;63(9):3683-92. PMID: 173510.
59. Inagaki M, Kawaura T, Wakashima H, Kato M, Nishikawa S, Kashimura N. Different contributions of the outer and inner R-core residues of lipopolysaccharide to the recognition by spike H and G proteins of bacteriophage phiX174. *FEMS Microbiol Lett.* 2003;226(2):221-7.
60. Falt IC, Mills D, Schweda EK, Timmis KN, Lindberg AA. Construction of recombinant *aroA* salmonellae stably producing the *Shigella dysenteriae* serotype 1 O-antigen and structural characterization of the *Salmonella/Shigella* hybrid LPS. *Microb Pathog.* 1996;20(1):11-30.
61. Wang CS, Alaupovic P. Composition and structure of the O-specific side chain of endotoxin from *Serratia marcescens* Bizio. *Biochemistry.* 1973;12(2):309-15.
62. McGuire EJ, Binkley SB. The Structure and Chemistry of Colominic Acid. *Biochemistry.* 1964;3:247-51.
63. Stenutz R, Weintraub A, Widmalm G. The structures of *Escherichia coli* O-polysaccharide antigens. *FEMS Microbiol Rev.* 2006;30(3):382-403.
64. Kaczynski Z, Gajdus J, Dziadziszko H, Stepnowski P. Chemical structure of the somatic antigen isolated from *Salmonella Abortusequi* (O4). *J Pharm Biomed Anal.* 2009;50(4):679-82.
65. Saxena M, Di Fabio JL. *Salmonella typhi* O-polysaccharide--tetanus toxoid conjugated vaccine. *Vaccine.* 1994;12(10):879-84.
66. Landstrom J, Nordmark EL, Eklund R, Weintraub A, Seckler R, Widmalm G. Interaction of a *Salmonella enteritidis* O-antigen octasaccharide with the phage P22 tailspike protein by NMR spectroscopy and docking studies. *Glycoconj J.* 2008;25(2):137-43.
67. Ziolkowski A, Shashkov AS, Swierzko AS, Senchenkova SN, Toukach FV, Cedzynski M, et al. Structures of the O-antigens of *Proteus bacilli* belonging to OX group (serogroups O1-O3) used in Weil-Felix test. *FEBS Lett.* 1997;411(2-3):221-4.
68. Bartodziejska B, Toukach FV, Vinogradov EV, Senchenkova SN, Shashkov AS, Ziolkowski A, et al. Structural and serological studies of the related O-specific polysaccharides of *Proteus vulgaris* O21 and *Proteus mirabilis* O48 having oligosaccharide-phosphate repeating units. *Eur J Biochem.* 2000;267(23):6888-96.
69. Kolodziejska K, Siwinska M, Zych K, Rozalski A, Sidorczyk Z. Characterization and serological classification of O-specific polysaccharide of *Proteus mirabilis* TG 276-90 from *Proteus* serogroup O34. *Arch Immunol Ther Exp (Warsz).* 2006;54(3):223-6.
70. Perepelov AV, Rozalski A, Bartodziejska B, Senchenkova SN, Knirel YA. Structure of the O-polysaccharide of *Proteus mirabilis* O19 and reclassification of certain *Proteus* strains that were formerly classified in serogroup O19. *Arch Immunol Ther Exp (Warsz).* 2004;52(3):188-96.
71. Shashkov AS, Kocharova NA, Zatonsky GV, Blaszczyk A, Knirel YA, Rozalski A. Structure of the O-antigen of *Providencia stuartii* O20, a new polysaccharide containing 5,7-diacetamido-3,5,7,9-tetradecoxy-l-glycero-d-galacto-non-2-ulosonic acid. *Carbohydr Res.* 2007;342(3-4):653-8.
72. Ovchinnikova OG, Kocharova NA, Wykrota M, Shashkov AS, Knirel YA, Rozalski A. Structure of a colitose-containing O-polysaccharide from the lipopolysaccharide of *Providencia alcalifaciens* O6. *Carbohydr Res.* 2007;342(14):2144-8.
73. Kocharova NA, Ovchinnikova OG, Torzewska A, Shashkov AS, Knirel YA, Rozalski A. The structure of the O-polysaccharide from the lipopolysaccharide of *Providencia alcalifaciens* O36 containing 3-deoxy-d-manno-oct-2-ulosonic acid. *Carbohydr Res.* 2007;342(3-4):665-70.
74. Knirel YA, Dentovskaya SV, Senchenkova SN, Shaikhutdinova RZ, Kocharova NA, Anisimov AP. Structural features and structural variability of the lipopolysaccharide of *Yersinia pestis*, the cause of plague. *J Endotoxin Res.* 2006;12(1):3-9.
75. Shashkov AS, Senchenkova SN, Vinogradov EV, Zatonsky GV, Knirel YA, Literacka E, et al. Full structure of the O-specific polysaccharide of *Proteus mirabilis* O24 containing 3,4-O-[(S)-1-carboxyethylidene]-D-galactose. *Carbohydr Res.* 2000;329(2):453-7.
76. Perepelov AV, Wang Q, Liu B, Senchenkova SN, Feng L, Shashkov AS, et al. Structure of the O-polysaccharide of *Escherichia coli* O61, Another *E. coli* O-antigen That Contains 5,7-Diacetamido-3,5,7,9-tetradecoxy-l-glycero-D-galacto-non-2-ulosonic (Di-N-acetyl-8-epilegionaminic) Acid. *J Carbohydr Chem.* 2009;28(7-8):463-72.
77. Perepelov AV, Weintraub A, Liu B, Senchenkova SN, Shashkov AS, Feng L, et al. The O-polysaccharide of *Escherichia coli* O112ac has the same structure as that of *Shigella dysenteriae* type 2 but is devoid of O-acetylation: a revision of the *S. dysenteriae* type 2 O-polysaccharide structure. *Carbohydr Res.* 2008;343(5):977-81.
78. Volpi N. Separation of *Escherichia coli* 055:B5 lipopolysaccharide and detoxified lipopolysaccharide by high-performance capillary electrophoresis. *Electrophoresis.* 2003;24(17):3097-103.
79. Stroop CJ, Xu Q, Retzlaff M, Abeygunawardana C, Bush CA. Structural analysis and chemical depolymerization of the capsular polysaccharide of *Streptococcus pneumoniae* type 1. *Carbohydr Res.* 2002;337(4):335-44.

80. Barker SA, Bick SM, Brimacombe JS, Somers PJ. Purification of pneumococcus types II and V polysaccharides. *Carbohydr Res.* 1966;1(5):393-9.
81. Jones C. NMR assays for carbohydrate-based vaccines. *J Pharm Biomed Anal.* 2005;38(5):840-50.
82. Lefeber DJ, Gutierrez Gallego R, Grun CH, Proietti D, D'Ascenzi S, Costantino P, et al. Isolation of oligosaccharides from a partial-acid hydrolysate of pneumococcal type 3 polysaccharide for use in conjugate vaccines. *Carbohydr Res.* 2002;337(9):819-25.
83. Jansson PE, Lindberg B, Lindquist U. Structural studies of the capsular polysaccharide from *Streptococcus pneumoniae* type 4. *Carbohydr Res.* 1981;95(1):73-80.
84. Jansson PE, Lindberg B, Lindquist U. Structural studies of the capsular polysaccharide from *Streptococcus pneumoniae* type 5. *Carbohydr Res.* 1985;140(1):101-10.
85. Abeygunawardana C, Williams TC, Sumner JS, Hennessey JP, Jr. Development and validation of an NMR-based identity assay for bacterial polysaccharides. *Anal Biochem.* 2000;279(2):226-40.
86. Munoz R, Mollerach M, Lopez R, Garcia E. Characterization of the type 8 capsular gene cluster of *Streptococcus pneumoniae*. *J Bacteriol.* 1999;181(19):6214-9. PMID: 103657.
87. Rutherford TJ, Jones C, Davies DB, Elliott AC. NMR assignment and conformational analysis of the antigenic capsular polysaccharide from *Streptococcus pneumoniae* type 9N in aqueous solution. *Carbohydr Res.* 1994;265(1):79-96.
88. Fattom A, Lue C, Szu SC, Mestecky J, Schiffman G, Bryla D, et al. Serum antibody response in adult volunteers elicited by injection of *Streptococcus pneumoniae* type 12F polysaccharide alone or conjugated to diphtheria toxoid. *Infect Immun.* 1990;58(7):2309-12. PMID: 258813.
89. Leontin K, Lindberg B, Lönngren J. Structural studies of the capsular polysaccharide from *Streptococcus pneumoniae* Type 12F. *Can J Chem.* 1981;59(14):2081-5.
90. Dutton GG, Yang MT. Structural investigation of *Klebsiella* serotype K62 polysaccharide. *Carbohydr Res.* 1977;59(1):179-92.
91. Jones C, Whitley C, Lemercinier X. Full assignment of the proton and carbon NMR spectra and revised structure for the capsular polysaccharide from *Streptococcus pneumoniae* type 17F. *Carbohydr Res.* 2000;325(3):192-201.
92. Jones C, Aguilera B, van Boom JH, Buchanan JG. Confirmation of the D configuration of the 2-substituted arabinitol 1-phosphate residue in the capsular polysaccharide from *Streptococcus pneumoniae* Type 17F. *Carbohydr Res.* 2002;337(21-23):2353-8.
93. Jennings HJ, Rosell K-G, Carlo DJ. Structural determination of the capsular polysaccharide of *Streptococcus pneumoniae* type-19 (19F). *Can J Chem.* 1980;58(11):1069-74.
94. Richards JC, Perry MB, Carlo DJ. The specific capsular polysaccharide of *Streptococcus pneumoniae* type 20. *Can J Biochem Cell Biol.* 1983;61(4):178-90.
95. Beynon LM, Richards JC, Perry MB. Identification of the common antigenic determinant shared by *Streptococcus pneumoniae* serotypes 35A and 20 capsular polysaccharides--structural analysis of the *Streptococcus pneumoniae* serotype 35A capsular polysaccharide. *Eur J Biochem.* 1997;250(1):163-7.
96. Richards JC, Perry MB, Kniskern PJ. Structural analysis of the specific capsular polysaccharide of *Streptococcus pneumoniae* type 22F. *Can J Chem.* 1989;67(6):1038-50.
97. Richards JC, Perry MB. Structure of the specific capsular polysaccharide of *Streptococcus pneumoniae* type 23F (American type 23). *Biochem Cell Biol.* 1988;66(7):758-71.
98. Jones C. Full assignment of the NMR spectrum of the capsular polysaccharide from *Streptococcus pneumoniae* serotype 10A. *Carbohydr Res.* 1995;269(1):175-81.
99. Kennedy DA, Buchanan JG, Baddiley J. The type-specific substance from *Pneumococcus* type 11A(43). *Biochem J.* 1969;115(1):37-45. PMID: 1185066.
100. Jones C, Lemercinier X. Full NMR assignment and revised structure for the capsular polysaccharide from *Streptococcus pneumoniae* type 15B. *Carbohydr Res.* 2005;340(3):403-9.
101. Lugowski C, Jennings HJ. Structural determination of the capsular polysaccharide of *Streptococcus pneumoniae* type 18C (56). *Carbohydr Res.* 1984;131(1):119-29.
102. Perry MB, Daoust V, Carlo DJ. The specific capsular polysaccharide of *Streptococcus pneumoniae* type 9V. *Can J Biochem.* 1981;59(7):524-33.
103. Lemercinier X, Jones C. Full assignment of the <sup>1</sup>H and <sup>13</sup>C spectra and revision of the O-acetylation site of the capsular polysaccharide of *Streptococcus pneumoniae* Type 33F, a component of the current pneumococcal polysaccharide vaccine. *Carbohydr Res.* 2006;341(1):68-74.
104. Ovchinnikova OG, Rozalski A, Liu B, Knirel YA. O-antigens of bacteria of the genus *Providencia*: structure, serology, genetics, and biosynthesis. *Biochemistry (Mosc).* 2013;78(7):798-817.
105. Lam JS, Taylor VL, Islam ST, Hao Y, Kocincova D. Genetic and Functional Diversity of *Pseudomonas aeruginosa* Lipopolysaccharide. *Frontiers in microbiology.* 2011;2:118. PMID: 3108286.
106. King JD, Kocincova D, Westman EL, Lam JS. Review: Lipopolysaccharide biosynthesis in *Pseudomonas aeruginosa*. *Innate immunity.* 2009;15(5):261-312.
107. Luk JM, Lind SM, Tsang RS, Lindberg AA. Epitope mapping of four monoclonal antibodies recognizing the hexose core domain of *Salmonella* lipopolysaccharide. *The Journal of biological chemistry.* 1991;266(34):23215-25.
108. Jorbeck HJ, Svenson SB, Lindberg AA. Immunochemistry of *Salmonella* O-antigens: specificity of rabbit antibodies against the O-antigen 4 determinant elicited by whole bacteria and O-antigen 4 specific saccharide-protein conjugates. *J Immunol.* 1979;123(3):1376-81.
109. Knirel YA, Perepelov AV, Kondakova AN, Senchenkova SN, Sidorczyk Z, Rozalski A, et al. Structure and serology of O-antigens as the basis for classification of *Proteus* strains. *Innate Immun.* 17(1):70-96.
110. Knirel' Iu A, Kochetkov NK. [Structure of lipopolysaccharides from gram-negative bacteria. III. Structure of O-specific polysaccharides]. *Biokhimiia.* 1994;59(12):1784-851.
111. Toukach FV, Bartodziejska B, Senchenkova SN, Wykrota M, Shashkov AS, Rozalski A, et al. Structure of a new acidic O-antigen of *Proteus vulgaris* O22 containing O-acetylated 3-acetamido-3,6-dideoxy-D-glucose. *Carbohydr Res.* 1999;318(1-4):146-53.

112. Knirel YA, Kaca W, Paramonov NA, Cedzynski M, Vinogradov EV, Ziolkowski A, et al. Structure of the O-specific polysaccharide of *Proteus vulgaris* O25 containing 3-O-[(R)-1-carboxyethyl]-D-glucose. *Eur J Biochem*. 1997;247(3):951-4.
113. Torzewska A, Kondakova AN, Perepelov AV, Senchenkova SN, Shashkov AS, Rozalski A, et al. Structure of the O-specific polysaccharide of *Proteus vulgaris* O37 and close serological relatedness of the lipopolysaccharides of *P. vulgaris* O37 and *P. vulgaris* O46. *FEMS Immunol Med Microbiol*. 2001;31(3):227-34.
114. Toukach FV, Perepelov AV, Bartodziejska B, Shashkov AS, Blaszczyk A, Arbatsky NP, et al. Structure of the O-polysaccharide of *Proteus vulgaris* O44: a new O-antigen that contains an amide of D-glucuronic acid with L-alanine. *Carbohydr Res*. 2003;338(13):1431-5.
115. Bartodziejska B, Shashkov AS, Torzewska A, Grachev AA, Ziolkowski A, Paramonov NA, et al. Structure and serological specificity of a new acidic O-specific polysaccharide of *Proteus vulgaris* O45. *Eur J Biochem*. 1999;259(1-2):212-7.
116. Zych K, Kolodziejska K, Drzewiecka D, Perepelov AV, Knirel YA, Sidorczyk Z. Serological classification and epitope specificity of *Proteus vulgaris* TG 251 from *Proteus* serogroup O65. *Arch Immunol Ther Exp (Warsz)*. 2007;55(3):187-91.
117. Perepelov AV, Ujazda E, Senchenkova SN, Shashkov AS, Kaca W, Knirel YA. Structural and serological studies on the O-antigen of *Proteus mirabilis* O14, a new polysaccharide containing 2-[(R)-1-carboxyethylamino]ethyl phosphate. *Eur J Biochem*. 1999;261(2):347-53.
118. Toukach FV, Arbatsky NP, Shashkov AS, Knirel YA, Zych K, Sidorczyk Z. Structure of the O-specific polysaccharide of *Proteus mirabilis* O16 containing ethanolamine phosphate and ribitol phosphate. *Carbohydr Res*. 2001;331(2):213-8.
119. Kaca W, Glenska J, Lechowicz L, Grabowski S, Brauner A, Kwinkowski M. Serotyping of *Proteus mirabilis* clinical strains based on lipopolysaccharide O-polysaccharide and core oligosaccharide structures. *Biochemistry (Mosc)*. 76(7):851-61.
120. Shashkov AS, Toukach FV, Paramonov NA, Senchenkova SN, Katsa V, Knirel' Iu A. [Structure of a new lysine-containing O-specific polysaccharide from *Proteus mirabilis* O26]. *Biokhimiia*. 1996;61(1):24-33.
121. Vinogradov EV, Krajewska-Pietrasik D, Kaca W, Shashkov AS, Knirel YA, Kochetkov NK. Structure of *Proteus mirabilis* O27 O-specific polysaccharide containing amino acids and phosphoethanolamine. *Eur J Biochem*. 1989;185(3):645-50.
122. Radziejewska-Lebrecht J, Shashkov AS, Vinogradov EV, Grosskurth H, Bartodziejska B, Rozalski A, et al. Structure and epitope characterisation of the O-specific polysaccharide of *Proteus mirabilis* O28 containing amides of D-galacturonic acid with L-serine and L-lysine. *Eur J Biochem*. 1995;230(2):705-12.
123. Kondakova AN, Fudala R, Senchenkova SN, Shashkov AS, Knirel YA, Kaca W. Structure of a lactic acid ether-containing and glycerol phosphate-containing O-polysaccharide from *Proteus mirabilis* O40. *Carbohydr Res*. 2005;340(9):1612-7.
124. Senchenkova SN, Perepelov AV, Cedzynski M, Swierzko AS, Ziolkowski A, Shashkov AS, et al. Structure of a highly phosphorylated O-polysaccharide of *Proteus mirabilis* O41. *Carbohydr Res*. 2004;339(7):1347-52.
125. Nikolaev AV, Botvinko IV, Ross AJ. Natural phosphoglycans containing glycosyl phosphate units: structural diversity and chemical synthesis. *Carbohydr Res*. 2007;342(3-4):297-344.
126. Gremyakova TA, Vinogradov EV, Lindner B, Kocharova NA, Senchenkova SN, Shashkov AS, et al. The core structure of the lipopolysaccharide of *Yersinia pestis* strain KM218. Influence of growth temperature. *Advances in experimental medicine and biology*. 2003;529:229-31.
127. Dentovskaya SV, Anisimov AP, Kondakova AN, Lindner B, Bystrova OV, Svetoch TE, et al. Functional characterization and biological significance of *Yersinia pestis* lipopolysaccharide biosynthesis genes. *Biochemistry Biokhimiia*. 2011;76(7):808-22.
128. Knirel YA, Kondakova AN, Bystrova O V., Linder B., Shaikudinova R. Z., Dentovskaya S. V., Anisimov A. P. . New features of *Yersinia* lipopolysaccharides as revealed by high resolution electrospray ionization mass spectrometry. *Advanced Science Letters*. 2008;1:192-8.
129. Santra A, Misra AK. Convergent synthesis of the tetrasaccharide repeating unit of the O-antigen of *Shigella boydii* type 9. *Beilstein journal of organic chemistry*. 2011;7:1182-8. PMID: 3182426.
130. L'Vov V L, Iakovlev AP, Shashkov AS, Dmitriev BA. [Antigenic polysaccharides of *Shigella* bacteria. Structure of the polysaccharide chain of the lipopolysaccharide from *Shigella boydii*, type 11]. *Bioorganicheskaja khimiia*. 1991;17(1):111-20.
131. Liu B, Perepelov AV, Li D, Senchenkova SN, Han Y, Shashkov AS, et al. Structure of the O-antigen of *Salmonella* O66 and the genetic basis for similarity and differences between the closely related O-antigens of *Escherichia coli* O166 and *Salmonella* O66. *Microbiology*. 2010;156(Pt 6):1642-9.
132. Senchenkova SN, Feng L, Wang Q, Perepelov AV, Qin D, Shevelev SD, et al. Structural and genetic characterization of *Shigella boydii* type 17 O antigen and confirmation of two new genes involved in the synthesis of gluco-lactilic acid. *Biochemical and biophysical research communications*. 2006;349(1):289-95.
133. Feng L, Senchenkova SN, Wang W, Shashkov AS, Liu B, Shevelev SD, et al. Structural and genetic characterization of the *Shigella boydii* type 18 O antigen. *Gene*. 2005;355:79-86.
134. Perepelov AV, Wang Q, Senchenkova SN, Shevelev SD, Shashkov AS, Feng L, et al. Structure and characterization of the gene cluster of the O-antigen of *Escherichia coli* O49 containing 4,6-dideoxy-4-[(S)-3-hydroxybutanoylamino]-D-glucose. *Biochemistry (Mosc)*. 2008;73(4):406-10.
135. Feng L, Senchenkova SN, Yang J, Shashkov AS, Tao J, Guo H, et al. Synthesis of the heteropolysaccharide O antigen of *Escherichia coli* O52 requires an ABC transporter: structural and genetic evidence. *J Bacteriol*. 2004;186(14):4510-9.
136. Dmitriev BA, Knirel YA, Kochetkov NK, Jann B, Jann K. Cell-wall lipopolysaccharide of the 'Shigella-like' *Escherichia coli* O58. Structure of the polysaccharide chain. *Eur J Biochem*. 1977;79(1):111-5.
137. Wang W, Perepelov AV, Feng L, Shevelev SD, Wang Q, Senchenkova SN, et al. A group of *Escherichia coli* and *Salmonella enterica* O antigens sharing a common backbone structure. *Microbiology*. 2007;153(Pt 7):2159-67.
138. Perepelov AV, Liu B, Senchenkova SN, Shashkov AS, Feng L, Knirel YA, et al. Structure of the O-polysaccharide of *Escherichia coli* O112ab containing L-iduronic acid. *Carbohydr Res*. 2008;343(3):571-5.
139. Liu B, Perepelov AV, Guo D, Shevelev SD, Senchenkova SN, Feng L, et al. Structural and genetic relationships between the O-antigens of *Escherichia coli* O118 and O151. *FEMS Immunol Med Microbiol*. 60(3):199-207.
140. Kjellberg A, Urbina F, Weintraub A, Widmalm G. Structural analysis of the O-antigenic polysaccharide from the enteropathogenic *Escherichia coli* O125. *Eur J Biochem*. 1996;239(2):532-8.

141. Perepelov AV, Liu B, Senchenkova SN, Shashkov AS, Feng L, Knirel YA, et al. Close relation of the O-polysaccharide structure of *Escherichia coli* O168 and revised structure of the O-polysaccharide of *Shigella dysenteriae* type 4. *Carbohydr Res*. 2007;342(17):2676-81.
142. Feng L, Tao J, Guo H, Xu J, Li Y, Rezwan F, et al. Structure of the *Shigella dysenteriae* 7 O antigen gene cluster and identification of its antigen specific genes. *Microb Pathog*. 2004;36(2):109-15.
143. Ho N, Kondakova AN, Knirel YA, Creuzenet C. The biosynthesis and biological role of 6-deoxyheptose in the lipopolysaccharide O-antigen of *Yersinia pseudotuberculosis*. *Molecular microbiology*. 2008;68(2):424-47.
144. Kondakova AN, Ho N, Bystrova OV, Shashkov AS, Lindner B, Creuzenet C, et al. Structural studies of the O-antigens of *Yersinia pseudotuberculosis* O:2a and mutants thereof with impaired 6-deoxy-D-manno-heptose biosynthesis pathway. *Carbohydr Res*. 2008;343(8):1383-9.
145. Kondakova AN, Bystrova OV, Shaikhutdinova RZ, Ivanov SA, Dentovskaya SV, Shashkov AS, et al. Reinvestigation of the O-antigens of *Yersinia pseudotuberculosis*: revision of the O2c and confirmation of the O3 antigen structures. *Carbohydr Res*. 2008;343(14):2486-8.
146. Kondakova AN, Bystrova OV, Shaikhutdinova RZ, Ivanov SA, Dentovskaya SV, Shashkov AS, et al. Structure of the O-antigen of *Yersinia pseudotuberculosis* O:4b. *Carbohydr Res*. 2009;344(1):152-4.
147. Kondakova AN, Vinogradov E, Lindner B, Knirel YA, Amano K. Structural studies on the lipopolysaccharide core of *Proteus* OX strains used in Weil-Felix test: a mass spectrometric approach. *Carbohydrate research*. 2003;338(23):2697-709.
148. Kondakova AN, Fudala R, Senchenkova SN, Shashkov AS, Knirel YA, Kaca W. Structural and serological studies of the O-antigen of *Proteus mirabilis* O-9. *Carbohydr Res*. 2003;338(11):1191-6.
149. Fudala R, Kondakova AN, Bednarska K, Senchenkova SN, Shashkov AS, Knirel YA, et al. Structure and serological characterization of the O-antigen of *Proteus mirabilis* O18 with a phosphocholine-containing oligosaccharide phosphate repeating unit. *Carbohydr Res*. 2003;338(18):1835-42.
150. Toukach FV, Shashkov AS. Computer-assisted structural analysis of regular glycopolymers on the basis of <sup>13</sup>C NMR data. *Carbohydr Res*. 2001;335(2):101-14.
151. Cedzynski M, Knirel YA, Rozalski A, Shashkov AS, Vinogradov EV, Kaca W. The structure and serological specificity of *Proteus mirabilis* O43 O antigen. *Eur J Biochem*. 1995;232(2):558-62.
152. Kondakova AN, Linder B, Fudala R, Senchenkova SN, Moll H, Shashkov AS, et al. New structures of the O-specific polysaccharides of proteus. 4. Polysaccharides containing unusual acidic N-acyl derivatives of 4-amino-4,6-dideoxy-D-glucose. *Biochemistry (Mosc)*. 2004;69(9):1034-43.
153. Adhikari P, Allison G, Whittle B, Verma NK. Serotype 1a O-antigen modification: molecular characterization of the genes involved and their novel organization in the *Shigella flexneri* chromosome. *J Bacteriol*. 1999;181(15):4711-8. PMID: 103612.
154. Theillet FX, Simenel C, Guerreiro C, Phalipon A, Mulard LA, Delepierre M. Effects of backbone substitutions on the conformational behavior of *Shigella flexneri* O-antigens: implications for vaccine strategy. *Glycobiology*. 2011;21(1):109-21.
155. Theillet FX, Saul FA, Vulliez-Le Normand B, Hoos S, Felici F, Weintraub A, et al. Structural mimicry of O-antigen by a peptide revealed in a complex with an antibody raised against *Shigella flexneri* serotype 2a. *Journal of molecular biology*. 2009;388(4):839-50.
156. Perepelov AV, Shekht ME, Liu B, Shevelev SD, Ledov VA, Senchenkova SN, et al. *Shigella flexneri* O-antigens revisited: final elucidation of the O-acetylation profiles and a survey of the O-antigen structure diversity. *FEMS Immunol Med Microbiol*. 2012;66(2):201-10.
157. Feng L, Senchenkova SN, Yang J, Shashkov AS, Tao J, Guo H, et al. Structural and genetic characterization of the *Shigella boydii* type 13 O antigen. *J Bacteriol*. 2004;186(2):383-92. PMID: 305744.
158. Hu B, Perepelov AV, Liu B, Shevelev SD, Guo D, Senchenkova SN, et al. Structural and genetic evidence for the close relationship between *Escherichia coli* O71 and *Salmonella enterica* O28 O-antigens. *FEMS Immunol Med Microbiol*. 2009;59(2):161-9.
159. Perepelov AV, Li D, Liu B, Senchenkova SN, Guo D, Shashkov AS, et al. Structural and genetic characterization of the closely related O-antigens of *Escherichia coli* O85 and *Salmonella enterica* O17. *Innate Immun*. 2011;17(2):164-73.
160. Perepelov AV, Li D, Liu B, Senchenkova SN, Guo D, Shevelev SD, et al. Structural and genetic characterization of *Escherichia coli* O99 antigen. *FEMS Immunol Med Microbiol*. 2009;57(1):80-7.
161. Feng L, Senchenkova SN, Tao J, Shashkov AS, Liu B, Shevelev SD, et al. Structural and genetic characterization of enterohemorrhagic *Escherichia coli* O145 O antigen and development of an O145 serogroup-specific PCR assay. *J Bacteriol*. 2005;187(2):758-64.
162. Wang Q, Perepelov AV, Feng L, Knirel YA, Li Y, Wang L. Genetic and structural analyses of *Escherichia coli* O107 and O117 O-antigens. *FEMS Immunol Med Microbiol*. 2009;55(1):47-54.
163. Perepelov AV, Liu B, Senchenkova SN, Shashkov AS, Feng L, Wang L, et al. Structure of O-antigen and functional characterization of O-antigen gene cluster of *Salmonella enterica* O47 containing ribitol phosphate and 2-acetimidoylamino-2,6-dideoxy-L-galactose. *Biochemistry (Mosc)*. 2009;74(4):416-20.
164. Liu B, Perepelov AV, Svensson MV, Shevelev SD, Guo D, Senchenkova SN, et al. Genetic and structural relationships of *Salmonella* O55 and *Escherichia coli* O103 O-antigens and identification of a 3-hydroxybutanoyltransferase gene involved in the synthesis of a Fuc3N derivative. *Glycobiology*. 2010;20(6):679-88.
